# Supplementary material
Source: Frontiers journal article supplement (https://www.frontiersin.org/articles/442712)
Supplement: Table_1.xlsx [file Table_1.xlsx]

## Sheet: English
	Emission per hectare UAA (or Livestock Unit)																			Emission per hectare UAA (or Livestock Unit)
	Pesticide use			Use antibiotics			Ammonia emission			N surplus			P surplus			GHG emssion
	Mean 2011-2016			Mean 2011-2015			Mean 2011-2016			Mean 2009-2012			Mean 2009-2012			Mean 2011-2015													Emission or use per hectare UAA (PCU for antibiotics): (Index 100 = mean value EU)
		kg/ha UAA			mg/PCU		GgNH3/ha				kg N/ha/year	ABS value		kg P/ha/year	ABS value		MtCO2eq/ha			Bestrijdingsmiddelen	Antibiotica	Ammoniak emissie	N overschot	P overschot	Broeikasgassen				Pesticides use	Antibiotics use	Ammonia emissions	N surplus	P surplus	GHG emissions	Mean score	Rank				Score eco-eff	Score env press	Score eco-eff	Score env press	Total	Rank	Index Eco	Index Pres	Combined score	Rank
	Austria	1.30463		Austria	54.72		Austria	22.6904		Austria	19.75	19.75	Austria	-2.75	2.75	Austria	2.58094		Austria	52.6853	47.73	93.456	34.1674	62.9682	84.4209			Austria	52.6853	47.73	93.456	34.1674	62.9682	84.4209	62.5713	8			Austria	121.806	62.5713	55.7597	56.104	111.864	5	6	8	14	4
	Belgium	4.90231		Belgium	160.68		Belgium	48.3999		Belgium	119.25	119.25	Belgium	4.75	4.75	Belgium	7.49936		Belgium	197.972	140.155	199.347	206.302	108.763	245.299			Belgium	197.972	140.155	199.347	206.302	108.763	245.299	182.973	24			Belgium	89.1187	182.973	47.5052	19.7437	67.249	25	15	24	39	24
	Bulgaria	0.351065		Bulgaria	102.48		Bulgaria	7.86459		Bulgaria	14.25	14.25	Bulgaria	-5	5	Bulgaria	1.05066		Bulgaria	14.1772	89.3891	32.3923	24.6525	114.488	34.3664			Bulgaria	14.1772	89.3891	32.3923	24.6525	114.488	34.3664	51.5775	7			Bulgaria	89.6027	51.5775	47.6275	59.4241	107.052	7	14	7	21	8
	Croatia	1.50301		Croatia	108.2		Croatia	21.3728		Croatia	70		Croatia	7.25		Croatia	1.88521		Croatia	60.6967	94.3785				61.6643			Croatia	60.6967	94.3785				61.6643	72.2465	12			Croatia	91.3321	72.2465	48.0642	53.1822	101.246	11	12	12	24	10.5
	Cyprus	7.40665		Cyprus	411.12		Cyprus	48.6437		Cyprus	194.75	194.75	Cyprus	32	32	Cyprus	5.17224		Cyprus	299.106	358.603	200.351	336.917	732.721	169.181			Czech Republic	72.5039	68.4898	75.9237	127.155	62.9682	75.8779	80.4864	17			Czech Republic	44.2693	80.4864	36.1794	50.6938	86.8732	23	25	17	42	25
	Czech Republic	1.79539		Czech Republic	78.52		Czech Republic	18.4336		Czech Republic	73.5	73.5	Czech Republic	-2.75	2.75	Czech Republic	2.31976		Czech Republic	72.5039	68.4898	75.9237	127.155	62.9682	75.8779			Denmark	57.3916	38.0305	109.982	129.317	91.5901	127.599	92.3184	20			Denmark	94.5155	92.3184	48.8681	47.1207	95.9888	15	9	20	29	15
	Denmark	1.42116		Denmark	43.6		Denmark	26.7028		Denmark	74.75	74.75	Denmark	4	4	Denmark	3.90098		Denmark	57.3916	38.0305	109.982	129.317	91.5901	127.599			Estonia	25.1885	60.4127	45.599	43.6824	188.905	44.1885	67.9959	10			Estonia	57.5337	67.9959	39.5291	54.4658	93.9949	18	24	10	34	20
	Estonia	0.623732		Estonia	69.26		Estonia	11.0711		Estonia	25.25	25.25	Estonia	-8.25	8.25	Estonia	1.35094		Estonia	25.1885	60.4127	45.599	43.6824	188.905	44.1885			Finland	64.3374	18.9804	53.1203	80.0124	85.8657	92.7642	65.8467	9			Finland	93.4485	65.8467	48.5986	55.1149	103.714	9	11	9	20	7
	Finland	1.59316		Finland	21.76		Finland	12.8972		Finland	46.25	46.25	Finland	3.75	3.75	Finland	2.83601		Finland	64.3374	18.9804	53.1203	80.0124	85.8657	92.7642			France	95.4277	85.7256	84.1588	83.0399	11.4488	88.8847	74.7809	13			France	139.063	74.7809	60.1179	52.4168	112.535	4	4	13	17	5
	France	2.36304		France	98.28		France	20.4331		France	48	48	France	0.5	0.5	France	2.71741		France	95.4277	85.7256	84.1588	83.0399	11.4488	88.8847			Germany	110.786	147.098	153.989	143.157	17.1731	128.344	116.758	22			Germany	105.85	116.758	51.7304	39.7402	91.4706	20	8	22	30	17
	Germany	2.74336		Germany	168.64		Germany	37.3872		Germany	82.75	82.75	Germany	0.75	0.75	Germany	3.92376		Germany	110.786	147.098	153.989	143.157	17.1731	128.344			Greece	42.7038	49.8932	42.4928	102.07	5.72438	51.2443	49.0214	6			Greece	187.837	49.0214	72.4346	60.196	132.631	1	2	6	8	1
	Greece	1.05746		Greece	57.2		Greece	10.3169		Greece	59	59	Greece	0.25	0.25	Greece	1.56665		Greece	42.7038	49.8932	42.4928	102.07	5.72438	51.2443			Hungary	66.3483	187.274	57.0581	63.5774	45.7951	38.3421	76.3992	15			Hungary	70.9532	76.3992	42.9179	51.9281	94.846	16	18	15	33	19
	Hungary	1.64296		Hungary	214.7		Hungary	13.8532		Hungary	36.75	36.75	Hungary	-2	2	Hungary	1.17221		Hungary	66.3483	187.274	57.0581	63.5774	45.7951	38.3421			Ireland	28.2174	44.6597	99.0246	64.8749	45.7951	135.242	69.6356	11			Ireland	61.8365	69.6356	40.6156	53.9707	94.5863	17	21	11	32	18
	Ireland	0.698737		Ireland	51.2		Ireland	24.0424		Ireland	37.5	37.5	Ireland	2	2	Ireland	4.13465		Ireland	28.2174	44.6597	99.0246	64.8749	45.7951	135.242			Italy	194.023	290.986	115.773	83.9049	80.1413	78.9585	140.631	23			Italy	155.23	140.631	64.2004	32.5307	96.7311	13	3	23	26	12.5
	Italy	4.80452		Italy	333.6		Italy	28.1086		Italy	48.5	48.5	Italy	-3.5	3.5	Italy	2.41394		Italy	194.023	290.986	115.773	83.9049	80.1413	78.9585			Latvia	29.9468	33.1807	30.0129	13.84	11.4488	45.3782	27.3012	1			Latvia	57.7704	27.3012	39.5888	66.7553	106.344	8	23	1	24	10.5
	Latvia	0.741562		Latvia	38.04		Latvia	7.28688		Latvia	8	8	Latvia	-0.5	0.5	Latvia	1.38731		Latvia	29.9468	33.1807	30.0129	13.84	11.4488	45.3782			Lithuania	36.7451	31.4362	44.5802	23.355	40.0707	50.3047	37.7486	2			Lithuania	86.8354	37.7486	46.9286	63.6003	110.529	6	16	2	18	6
	Lithuania	0.909905		Lithuania	36.04		Lithuania	10.8237		Lithuania	13.5	13.5	Lithuania	-1.75	1.75	Lithuania	1.53793		Lithuania	36.7451	31.4362	44.5802	23.355	40.0707	50.3047			Netherlands	235.897	68.2805	242.161	286.314	194.629	328.909	226.032	25			Netherlands	207.166	226.032	77.3159	6.74043	84.0563	24	1	25	26	12.5
	Luxembourg	1.51872		Luxembourg	42.7		Luxembourg	45.4364		Luxembourg	87.5	87.5	Luxembourg	0.75	0.75	Luxembourg	5.05361		Luxembourg	61.3311	37.2455	187.141	151.375	17.1731	165.301			Poland	64.3116	121.017	75.4735	77.8499	45.7951	68.3089	75.4594	14			Poland	61.6101	75.4594	40.5585	52.212	92.7704	19	22	14	36	21
	Malta	12.4957					Malta	66.7381		Malta	114.25	114.25	Malta	14.5	14.5	Malta	5.74036		Malta	504.621		274.878	197.652	332.014	187.764			Portugal	126.241	146.871	49.6802	29.4099	51.5194	57.7135	76.9059	16			Portugal	89.8267	76.9059	47.684	51.7751	99.4591	12	13	16	29	15
	Netherlands	5.84143		Netherlands	78.28		Netherlands	58.7946		Netherlands	165.5	165.5	Netherlands	8.5	8.5	Netherlands	10.0555		Netherlands	235.897	68.2805	242.161	286.314	194.629	328.909			Romania	32.046	91.3692	44.3805	11.6775	57.2438	42.7555	46.5787	5			Romania	116.843	46.5787	54.5064	60.9336	115.44	3	7	5	12	3
	Poland	1.59252		Poland	138.74		Poland	18.3243		Poland	45	45	Poland	2	2	Poland	2.08836		Poland	64.3116	121.017	75.4735	77.8499	45.7951	68.3089			Slovakia	43.2528	47.0671	62.4542	55.3599	15.265	50.0466	45.5743	3			Slovakia	66.4998	45.5743	41.7933	61.237	103.03	10	20	3	23	9
	Portugal	3.12606		Portugal	168.38		Portugal	12.0619		Portugal	17	17	Portugal	2.25	2.25	Portugal	1.76443		Portugal	126.241	146.871	49.6802	29.4099	51.5194	57.7135			Slovenia	88.6707	28.8369	138.813	91.2573	80.1413	116.755	90.7456	19			Slovenia	94.1014	90.7456	48.7635	47.5957	96.3592	14	10	19	29	15
	Romania	0.793543		Romania	104.75		Romania	10.7752		Romania	-6.75	6.75	Romania	-2.5	2.5	Romania	1.30713		Romania	32.046	91.3692	44.3805	11.6775	57.2438	42.7555			Spain	94.5304	309.844	55.2824	65.3074	74.417	35.7496	105.855	21			Spain	83.3222	105.855	46.0415	43.0327	89.0742	22	17	21	38	23
	Slovakia	1.07105		Slovakia	53.96		Slovakia	15.1634		Slovakia	32	32	Slovakia	-0.666667	0.666667	Slovakia	1.53004		Slovakia	43.2528	47.0671	62.4542	55.3599	15.265	50.0466			Sweden	30.4708	11.0079	63.9963	64.8749	28.6219	74.6023	45.5957	4			Sweden	138.432	45.5957	59.9584	61.2305	121.189	2	5	4	9	2
	Slovenia	2.19572		Slovenia	33.06		Slovenia	33.7026		Slovenia	52.75	52.75	Slovenia	3.5	3.5	Slovenia	3.56945		Slovenia	88.6707	28.8369	138.813	91.2573	80.1413	116.755			United Kingdom	70.3691	52.039	80.4504	111.152	97.3145	120.036	88.5602	18			United Kingdom	70.1403	88.5602	42.7126	48.2556	90.9682	21	19	18	37	22
	Spain	2.34082		Spain	355.22		Spain	13.4221		Spain	37.75	37.75	Spain	3.25	3.25	Spain	1.09294		Spain	94.5304	309.844	55.2824	65.3074	74.417	35.7496			EU mean	2.47626	114.645	24.2792	57.8519	4.36728	3.05722					Mean	98.9977	82.7839	50	50	100
	Sweden	0.754535		Sweden	12.62		Sweden	15.5378		Sweden	37.5	37.5	Sweden	-1.25	1.25	Sweden	2.28076		Sweden	30.4708	11.0079	63.9963	64.8749	28.6219	74.6023			Unit	kg/ha	mg/PCU	kg/ha	kg/ha	kg/ha	tCO2-eq/ha
	United Kingdom	1.74252		United Kingdom	59.66		United Kingdom	19.5327		United Kingdom	64.25	64.25	United Kingdom	4.25	4.25	United Kingdom	3.66977		United Kingdom	70.3691	52.039	80.4504	111.152	97.3145	120.036
	EU28	2.10939		European Union	146.157		EU28	19.6166		European Union	46.75	46.75	European Union	1	1	European Union	2.37914		EU	85.1844	127.487	80.7958	80.8774	22.8975	77.8201
	Average	2.47626			114.645			24.2792			57.8036	57.8519		2.2619	4.36728		3.05722
		Emission or use per unit Gross Added Value																		Emission or use per unit Gross Added Value									Emission or use per unit of Gross Added Value of agriculture
		kg/1000€ GVA			kg PCU/1000€ GVA			kgNH3/1000€ GVA			kg/1000 euro	ABS value		kg/1000 euro	ABS value		kgCO2eq/€ GVA			Bestrijdingsmiddelen	Antibiotica	Ammoniak emissie	N overschot	P overschot	Broeikasgassen				Pesticides use	Antibiotics use	Ammonia emissions	N surplus	P surplus	GHG emissions	Mean score	Rank	Mean score
	Austria	1.28808		Austria	18.7238		Austria	22.5775		Austria	9.94882	9.94882	Austria	-1.38528	1.38528	Austria	2.54819		Austria	54.2907	43.3626	78.2189	37.6001	66.925	69.8954		AU	Austria	54.2907	43.3626	78.2189	37.6001	66.925	69.8954	58.3821	2
	Belgium	2.84873		Belgium	120.21		Belgium	27.8084		Belgium	19.2007	19.2007	Belgium	0.764808	0.764808	Belgium	4.35787		Belgium	120.07	278.395	96.341	72.5662	36.9491	119.534		BE	Belgium	120.07	278.395	96.341	72.5662	36.9491	119.534	120.643	20
	Bulgaria	1.04997		Bulgaria	23.1457		Bulgaria	24.1865		Bulgaria	19.0192	19.0192	Bulgaria	-6.6734	6.6734	Bulgaria	3.14232		Bulgaria	44.2547	53.6033	83.7932	71.8801	322.402	86.1918		BU	Bulgaria	44.2547	53.6033	83.7932	71.8801	322.402	86.1918	110.354	18
	Croatia	2.03503		Croatia	29.0842			27.979								Croatia	2.55253		Croatia	85.774	67.3561	62.1726			70.0144		CR	Croatia	85.774	67.3561	62.1726			70.0144	71.3293	5
	Cyprus	2.6877		Cyprus	145.679		Cyprus	17.9458		Cyprus	32.8342	32.8342	Cyprus	5.39509	5.39509	Cyprus	1.87689		Cyprus	113.283	337.378	169.561	124.092	260.645	51.4818		CZ	Czech Republic	180.68	86.3819	86.4319	290.505	138.942	151.924	155.811	24
	Czech Republic	4.28672		Czech Republic	37.2994		Czech_Republic	48.9431		Czech Republic	76.8664	76.8664	Czech Republic	-2.87596	2.87596	Czech Republic	5.53872		Czech Republic	180.68	86.3819	86.4319	290.505	138.942	151.924		DK	Denmark	56.2241	86.2482	120.89	77.3827	52.933	100.435	82.3521	9
	Denmark	1.33395		Denmark	37.2417		Denmark	24.9482		Denmark	20.4752	20.4752	Denmark	1.09566	1.09566	Denmark	3.66157		Denmark	56.2241	86.2482	120.89	77.3827	52.933	100.435		ES	Estonia	85.6336	66.6919	81.1971	129.517	540.945	120.702	170.781	25
	Estonia	2.0317		Estonia	28.7974		Estonia	34.8943		Estonia	34.2697	34.2697	Estonia	-11.197	11.197	Estonia	4.40046		Estonia	85.6336	66.6919	81.1971	129.517	540.945	120.702		FI	Finland	123.152	21.0845	70.5719	95.5427	99.0264	142.666	92.0073	11
	Finland	2.92185		Finland	9.10421		Finland	23.4372		Finland	25.2802	25.2802	Finland	2.04975	2.04975	Finland	5.20122		Finland	123.152	21.0845	70.5719	95.5427	99.0264	142.666		FR	France	99.8507	56.9473	115.369	78.5324	10.4571	74.7252	72.6469	6
	France	2.36901		France	24.5897		France	20.3703		France	20.7794	20.7794	France	0.216452	0.216452	France	2.72427		France	99.8507	56.9473	115.369	78.5324	10.4571	74.7252		GE	Germany	102.932	181.041	36.7388	115	13.3238	95.8084	90.8075	10
	Germany	2.44212		Germany	78.1729		Germany	33.3006		Germany	30.4286	30.4286	Germany	0.275788	0.275788	Germany	3.49291		Germany	102.932	181.041	36.7388	115	13.3238	95.8084		GR	Greece	45.5118	31.9843	92.016	174.767	9.46634	43.8799	66.2709	4
	Greece	1.07979		Greece	13.8107		Greece	10.6045		Greece	46.2427	46.2427	Greece	0.195944	0.195944	Greece	1.59974		Greece	45.5118	31.9843	92.016	174.767	9.46634	43.8799		HU	Hungary	121.309	135.706	195.698	131.364	91.3868	56.3254	121.965	22
	Hungary	2.87813		Hungary	58.5974		Hungary	26.56		Hungary	34.7584	34.7584	Hungary	-1.89162	1.89162	Hungary	2.05347		Hungary	121.309	135.706	195.698	131.364	91.3868	56.3254		IR	Ireland	63.4098	107.516	40.9573	105.406	71.8617	244.181	105.555	16
	Ireland	1.50443		Ireland	46.425		Ireland	56.4874		Ireland	27.8899	27.8899	Ireland	1.48746	1.48746	Ireland	8.90219		Ireland	63.4098	107.516	40.9573	105.406	71.8617	244.181		IT	Italy	82.558	100.807	161.207	59.8718	55.231	26.994	81.1115	8
	Italy	1.95873		Italy	43.528		Italy	11.8221		Italy	15.8418	15.8418	Italy	-1.14323	1.14323	Italy	0.984128		Italy	82.558	100.807	161.207	59.8718	55.231	26.994		LV	Latvia	186.418	50.9526	117.055	83.3864	66.6207	226.959	121.899	21
	Latvia	4.42287		Latvia	22.0012		Latvia	46.5317		Latvia	22.0637	22.0637	Latvia	-1.37898	1.37898	Latvia	8.27431		Latvia	186.418	50.9526	117.055	83.3864	66.6207	226.959		LT	Lithuania	106.049	27.086	196.609	66.7497	110.608	116.649	103.959	14
	Lithuania	2.51608		Lithuania	11.6957		Lithuania	33.7875		Lithuania	17.6617	17.6617	Lithuania	-2.28948	2.28948	Lithuania	4.25269		Lithuania	106.049	27.086	196.609	66.7497	110.608	116.649		NL	Netherlands	46.6254	61.9701	107.582	48.5819	31.8955	52.2323	58.1478	1
	Luxembourg	1.86731		Luxembourg	21.2408		Luxembourg	56.7504		Luxembourg	35.1492	35.1492	Luxembourg	0.301279	0.301279	Luxembourg	6.21355		Luxembourg	78.7045	49.1916	48.4167	132.841	14.5552	170.434		PO	Poland	111.597	155.236	63.3705	138.972	78.955	95.2365	107.228	17
	Malta	2.49006					Malta	13.9753		Malta	8.40339	8.40339	Malta	1.06651	1.06651	Malta	1.1439		Malta	104.953		39.5313	31.7593	51.5249	31.3764		PT	Portugal	199.824	159.681	74.458	37.8153	63.9787	73.3984	101.526	13
	Netherlands	1.10621		Netherlands	26.7585		Netherlands	11.4105		Netherlands	12.8546	12.8546	Netherlands	0.660205	0.660205	Netherlands	1.90424		Netherlands	46.6254	61.9701	107.582	48.5819	31.8955	52.2323		RO	Romania	65.9418	88.4907	199.916	22.584	106.923	70.6873	92.4238	12
	Poland	2.6477		Poland	67.0306		Poland	31.0529		Poland	36.7715	36.7715	Poland	1.63429	1.63429	Poland	3.47206		Poland	111.597	155.236	63.3705	138.972	78.955	95.2365		SK	Slovakia	152.862	54.0664	125.49	124.168	33.0676	142.11	105.294	15
	Portugal	4.74093		Portugal	68.9495		Portugal	18.2916		Portugal	10.0058	10.0058	Portugal	1.3243	1.3243	Portugal	2.67591		Portugal	199.824	159.681	74.458	37.8153	63.9787	73.3984		SV	Slovenia	95.4685	28.7254	64.0969	88.4289	75.0022	100.999	75.4535	7
	Romania	1.56451		Romania	38.21		Romania	21.492		Romania	-5.97563	5.97563	Romania	-2.2132	2.2132	Romania	2.57707		Romania	65.9418	88.4907	199.916	22.584	106.923	70.6873		ES	Spain	133.135	266.266	96.3792	99.4529	109.45	40.4533	124.189	23
	Slovakia	3.62674		Slovakia	23.3457		Slovakia	57.7049		Slovakia	32.8543	32.8543	Slovakia	-0.684466	0.684466	Slovakia	5.18093		Slovakia	152.862	54.0664	125.49	124.168	33.0676	142.11		SE	Sweden	56.2098	13.748	73.578	80.9761	34.504	110.572	61.598	3
	Slovenia	2.26504		Slovenia	12.4035		Slovenia	36.2222		Slovenia	23.3979	23.3979	Slovenia	1.55247	1.55247	Slovenia	3.68215		Slovenia	95.4685	28.7254	64.0969	88.4289	75.0022	100.999		UK	United Kingdom	83.2778	90.0828	78.999	180.257	152.42	114.136	116.529	19
	Spain	3.15869		Spain	114.973		Spain	18.5013		Spain	26.3148	26.3148	Spain	2.26552	2.26552	Spain	1.47482		Spain	133.135	266.266	96.3792	99.4529	109.45	40.4533
	Sweden	1.33361		Sweden	5.93632		Sweden	27.8194		Sweden	21.426	21.426	Sweden	-0.714199	0.714199	Sweden	4.03114		Sweden	56.2098	13.748	73.578	80.9761	34.504	110.572
	United Kingdom	1.97581		United Kingdom	38.8974		United_Kingdom	22.8027		United Kingdom	47.6952	47.6952	United Kingdom	3.15494	3.15494	United Kingdom	4.16107		United Kingdom	83.2778	90.0828	78.999	180.257	152.42	114.136
	EU28	2.2614		EU28	53.0998		Total_EU27	21.238		European Union	24.6733	24.6733	European Union	0.527771	0.527771	European Union	2.55059		EU	95.3149	122.974	73.578	93.2489	25.4974	69.961
	Average	2.37255			43.1797			28.8646			26.017	26.4596		0.333569	2.0699		3.64573
	Gross Added Value per unit Emission or use																			Gross Added Value per unit Emission or use									Gross Value Added per unit Emission or use (Index 100 = mean value EU)
		€ GVA/kg			€ GVA/kg PCU			1000€ GVA/kgNH3			euro GVA/kg	ABS value		1000 euro GVA/kg	ABS value		€ GVA/kgCO2eq/			Bestrijdingsmiddelen	Antibiotica	Ammoniak emissie	N overschot	P overschot	Broeikasgassen				Pesticides use	Antibiotics use	Ammonia emissions	N surplus	P surplus	GHG emissions	Land use	Mean score	Rank
	Austria	776.352		Austria	53.4079		Austria	44.6988		Austria	100.514	100.514	Austria	-721.876	721.876	Austria	0.392435		Austria	155.013	127.706	101.899	194.256	59.7081	107.423		AU	Austria	155.013	127.706	101.899	194.256	59.7081	107.423	106.634	121.806	6
	Belgium	351.034		Belgium	8.31876		Belgium	35.5561		Belgium	52.0814	52.0814	Belgium	1307.52	1307.52	Belgium	0.22947		Belgium	70.0903	19.8914	81.0563	100.654	108.148	62.814		BE	Belgium	70.0903	19.8914	81.0563	100.654	108.148	62.814	181.177	89.1187	15
	Bulgaria	952.411		Bulgaria	43.2045		Bulgaria	42.7348		Bulgaria	52.5785	52.5785	Bulgaria	-149.849	149.849	Bulgaria	0.318236		Bulgaria	190.166	103.308	97.4214	101.614	12.3943	87.1125		BU	Bulgaria	190.166	103.308	97.4214	101.614	12.3943	87.1125	35.2018	89.6027	14
	Croatia	491.392		Croatia	34.383		Croatia	34.5804								Croatia	0.391768		Croatia	98.1155	82.2146	78.8322	0	0	107.241		CR	Croatia	98.1155	82.2146				107.241	77.7576	91.3321	12
	Cyprus	372.065		Cyprus	6.86442		Cyprus	56.9168		Cyprus	30.456	30.456	Cyprus	185.354	185.354	Cyprus	0.532797		Cyprus	74.2897	16.4138	129.752	58.8601	15.331	145.845		CZ	Czech Republic	46.5784	64.1067	51.7805	25.1426	28.76	49.4221	44.0946	44.2693	25
	Czech Republic	233.279		Czech Republic	26.8101		Czech Republic	22.714		Czech Republic	13.0096	13.0096	Czech Republic	-347.711	347.711	Czech Republic	0.180547		Czech Republic	46.5784	64.1067	51.7805	25.1426	28.76	49.4221		DK	Denmark	149.682	64.2061	90.9163	94.3887	75.4909	74.759	112.165	94.5155	9
	Denmark	749.655		Denmark	26.8516		Denmark	39.8812		Denmark	48.8397	48.8397	Denmark	912.691	912.691	Denmark	0.273107		Denmark	149.682	64.2061	90.9163	94.3887	75.4909	74.759		ES	Estonia	98.2764	83.0335	63.1172	56.3945	7.387	62.2061	32.3215	57.5337	24
	Estonia	492.198		Estonia	34.7254		Estonia	27.6869		Estonia	29.1803	29.1803	Estonia	-89.3094	89.3094	Estonia	0.227249		Estonia	98.2764	83.0335	63.1172	56.3945	7.387	62.2061		FI	Finland	68.3364	262.642	96.3259	76.4481	40.3525	52.6291	57.4058	93.4485	11
	Finland	342.249		Finland	109.839		Finland	42.2542		Finland	39.5566	39.5566	Finland	487.865	487.865	Finland	0.192263		Finland	68.3364	262.642	96.3259	76.4481	40.3525	52.6291		FR	France	84.2834	97.2418	111.287	93.0068	382.129	100.48	105.016	139.063	4
	France	422.117		France	40.6675		France	48.8172		France	48.1247	48.1247	France	4619.97	4619.97	France	0.36707		France	84.2834	97.2418	111.287	93.0068	382.129	100.48		GE	Germany	81.7601	30.5879	68.5398	63.5133	299.913	78.3688	118.268	105.85	8
	Germany	409.48		Germany	12.7922		Germany	30.0656		Germany	32.8638	32.8638	Germany	3625.97	3625.97	Germany	0.286294		Germany	81.7601	30.5879	68.5398	63.5133	299.913	78.3688		GR	Greece	184.914	173.137	218.674	41.793	422.123	171.112	103.104	187.837	2
	Greece	926.106		Greece	72.4074		Greece	95.9234		Greece	21.625	21.625	Greece	5103.5	5103.5	Greece	0.625101		Greece	184.914	173.137	218.674	41.793	422.123	171.112		HU	Hungary	69.3744	40.8063	93.7609	55.6015	43.7258	133.304	60.0992	70.9532	18
	Hungary	347.448		Hungary	17.0656		Hungary	41.1291		Hungary	28.77	28.77	Hungary	-528.649	528.649	Hungary	0.486981		Hungary	69.3744	40.8063	93.7609	55.6015	43.7258	133.304		IR	Ireland	132.72	51.5056	44.0811	69.2946	55.6063	30.7492	48.8984	61.8365	21
	Ireland	664.703		Ireland	21.5401		Ireland	19.3366		Ireland	35.8552	35.8552	Ireland	672.285	672.285	Ireland	0.112332		Ireland	132.72	51.5056	44.0811	69.2946	55.6063	30.7492		IT	Italy	101.938	54.9335	199.001	121.995	72.35	278.15	258.242	155.23	3
	Italy	510.534		Italy	22.9737		Italy	87.2934		Italy	63.124	63.124	Italy	-874.718	874.718	Italy	1.01613		Italy	101.938	54.9335	199.001	121.995	72.35	278.15		LV	Latvia	45.1445	108.683	52.2571	87.5928	59.9808	33.0826	17.6521	57.7704	23
	Latvia	226.097		Latvia	45.4522		Latvia	22.923		Latvia	45.3233	45.3233	Latvia	-725.173	725.173	Latvia	0.120856		Latvia	45.1445	108.683	52.2571	87.5928	59.9808	33.0826		LT	Lithuania	79.357	204.447	76.0508	109.424	36.1271	64.3676	38.0737	86.8354	16
	Lithuania	397.444		Lithuania	85.5018		Lithuania	33.3604		Lithuania	56.6196	56.6196	Lithuania	-436.78	436.78	Lithuania	0.235145		Lithuania	79.357	204.447	76.0508	109.424	36.1271	64.3676		NL	Netherlands	180.497	89.3602	204.979	150.345	125.283	143.75	555.947	207.166	1
	Luxembourg	535.531		Luxembourg	47.0792		Luxembourg	17.9155		Luxembourg	28.4502	28.4502	Luxembourg	3319.19	3319.19	Luxembourg	0.160939		Luxembourg	106.929	112.573	40.8415	54.9834	274.538	44.0546		PO	Poland	75.4121	35.6725	74.8539	52.5576	50.6106	78.8394	63.3243	61.6101	22
	Malta	401.597					Malta	74.9777		Malta	119	119	Malta	937.634	937.634	Malta	0.874204		Malta	80.1862	0	170.925	229.981	77.554	239.3		PT	Portugal	42.1159	34.6796	124.666	193.151	62.4577	102.296	69.4204	89.8267	13
	Netherlands	903.986		Netherlands	37.3713		Netherlands	89.916		Netherlands	77.7933	77.7933	Netherlands	1514.68	1514.68	Netherlands	0.525143		Netherlands	180.497	89.3602	204.979	150.345	125.283	143.75		RO	Romania	127.624	62.579	107.284	323.417	37.3724	106.22	53.4006	116.843	7
	Poland	377.687		Poland	14.9186		Poland	32.8353		Poland	27.195	27.195	Poland	611.887	611.887	Poland	0.288013		Poland	75.4121	35.6725	74.8539	52.5576	50.6106	78.8394		SK	Slovakia	55.0546	102.423	44.427	58.824	120.842	52.8352	31.0919	66.4998	20
	Portugal	210.929		Portugal	14.5034		Portugal	54.6859		Portugal	99.9422	99.9422	Portugal	755.118	755.118	Portugal	0.373705		Portugal	42.1159	34.6796	124.666	193.151	62.4577	102.296		SV	Slovenia	88.1522	192.779	65.5021	82.598	53.2779	74.3412	102.059	94.1014	10
	Romania	639.18		Romania	26.1711		Romania	47.0613		Romania	-167.346	167.346	Romania	-451.835	451.835	Romania	0.388038		Romania	127.624	62.579	107.284	323.417	37.3724	106.22		ES	Spain	63.2123	20.7975	125.666	73.4424	36.5093	185.606	78.0213	83.3222	17
	Slovakia	275.73		Slovakia	42.8345		Slovakia	19.4883		Slovakia	30.4374	30.4374	Slovakia	-1460.99	1460.99	Slovakia	0.193016		Slovakia	55.0546	102.423	44.427	58.824	120.842	52.8352		SE	Sweden	149.721	402.799	83.0221	90.2001	115.812	67.9051	59.5668	138.432	5
	Slovenia	441.493		Slovenia	80.6221		Slovenia	28.7331		Slovenia	42.7388	42.7388	Slovenia	644.135	644.135	Slovenia	0.271581		Slovenia	88.1522	192.779	65.5021	82.598	53.2779	74.3412		UK	United Kingdom	101.057	61.473	103.079	40.5203	26.2168	65.7848	92.8509	70.1403	19
	Spain	316.587		Spain	8.6977		Spain	55.1247		Spain	38.0014	38.0014	Spain	441.401	441.401	Spain	0.678051		Spain	63.2123	20.7975	125.666	73.4424	36.5093	185.606			EU mean	500.83	41.821	43.8659	51.7431	1209.01	365.316	949.832
	Sweden	749.846		Sweden	168.454		Sweden	36.4184		Sweden	46.6724	46.6724	Sweden	-1400.17	1400.17	Sweden	0.248069		Sweden	149.721	402.799	83.0221	90.2001	115.812	67.9051			unit	€/g	€/mg	€/kg	€/kg	€/kg	€/g CO2-eq	€/ha
	United Kingdom	506.122		United Kingdom	25.7086		United Kingdom	45.2167		United Kingdom	20.9665	20.9665	United Kingdom	316.964	316.964	United Kingdom	0.240323		United Kingdom	101.057	61.473	103.079	40.5203	26.2168	65.7848
weighted	EU28	442.204		EU28	18.8325		EU28	47.5667		European Union	40.5296	40.5296	European Union	1894.76	1894.76	European Union	0.392067		EU	88.2942	45.0312	108.437	78.3285	156.72	107.323			max/min	4.51531	20.25	4.96073	12.8633	57.1441	9.04576	31.4947	4.67968	207.166
	Average	500.83			41.821			43.8659			39.3471	51.7431		676.633	1209.01		0.365316
											Note: We use absolute values of N and P surplus
											Both a positive and a negative N and P balance can be problematic
		GVA/ha	Indexed
	Austria	1012.85	106.634
	Belgium	1720.88	181.177
	Bulgaria	334.358	35.2018
	Croatia	738.567	77.7576
	Czech Republic	418.825	44.0946
	Denmark	1065.38	112.165
	Estonia	307	32.3215
	Finland	545.259	57.4058
	France	997.479	105.016
	Germany	1123.35	118.268
	Greece	979.317	103.104
	Hungary	570.842	60.0992
	Ireland	464.453	48.8984
	Italy	2452.87	258.242
	Latvia	167.665	17.6521
	Lithuania	361.637	38.0737
	Netherlands	5280.57	555.947
	Poland	601.475	63.3243
	Portugal	659.377	69.4204
	Romania	507.217	53.4006
	Slovakia	295.321	31.0919
	Slovenia	969.394	102.059
	Spain	741.072	78.0213
	Sweden	565.785	59.5668
	United Kingdom	881.928	92.8509
	EU28	932.78
	Average	949.832
	Cyprus	2755.76
	Luxembourg	813.321
	Malta	5018.25
[truncated: 15 more columns]
