# Supplementary material
Source: Frontiers journal article supplement (https://www.frontiersin.org/articles/442712)
Supplement: Table_2.xlsx [file Table_2.xlsx]

## Sheet: Ware potato
	N balance							P balance
	Country	N-surplus	Total N-input	N-input manure	N-input syntheic fertilizer	Total N removal		Country	P-surplus	Total P-input	P-input manure	P-input syntheic fertilizer	Total P removal
				(kg N/ha)							(kg P/ha)
	FR	33	175	17	158	142		FR	17	39	4	35	22
	GE	23	163	33	130	140		GE	16	37	9	28	21
	NL	179	334	186	148	156		NL	44	67	52	15	24
	PL	-2	70	18	52	72		PL	5	16	5	11	11
	RO	9	56	11	45	47		RO	4	12	3	9	7
	NL specific	125	281	104	176	156		NL specific	12	36	24	11	24
	Yield & production value
	Country	Eurostat production value (€/ha)	FAO production value (€/ha)	Potato Yield (kg/ha)	Eurostat Potato prices (€/kg)	FAO Potato prices (€/kg)
	FR	17737.6	12221.7	44260	0.40076	0.276134
	GE	7670.9	8689.71	43550	0.17614	0.199534
	NL	7016.07	7713.65	48380	0.14502	0.159439
	PL	2824	2415.82	22310	0.12658	0.108284
	RO	5135.42	5845.3	14740	0.3484	0.39656
	NL specific	7016.07	7713.65	48380	0.14502	0.159439
	Land use
	Country	Total	Grassland national	Arable national
	FR	0.240834	0	0.240834
	GE	0.245041	0	0.245041
	NL	0.216489	0	0.216489
	PL	0.519752	0	0.519752
	RO	0.918238	0	0.918238
	NL specific	0.216489	0	0.216489
	Greenhouse gas emissions (LCA)							Breakdown N2O on farm
	Country	Total excl. LUC	N2O	CO2-fossil fuel	Other CO2	LUC			Fertilizer direct	indirect	Manure direct	indirect	Crop residues direct	indirect	Total
				CO2-eq/kg potato							CO2-eq/ha
	FR	0.074385	0.0461341	0.00947725	0.0168256	0.0019336		FR	2.483	0.8096	0.271	0.1152	1.125	0.2512	5.055
	GE	0.0657396	0.0427628	0.00914698	0.012363	0.00145914		GE	2.043	0.6639	0.5198	0.2209	1.113	0.2504	4.811
	NL	0.0939764	0.0684419	0.0087791	0.0152431	0.00150192		NL	2.326	0.7559	2.925	1.243	1.23	0.276	8.7559
	PL	0.102987	0.0639774	0.022763	0.0145814	0.00165644		PL	0.8121	0.2656	0.2778	0.1181	0.7472	0.8171	3.0379
	RO	0.06655	0.0440324	0.0134282	0.00811148	0.000975591		RO	0.7071	0.2298	0.178	0.0756	0.6168	0.1388	1.9461
	NL specific	0.0895287	0.063489	0.00939748	0.0150762	0.00155573
	P-surplus							P-surplus
	Country	P surplus (kg P/ha)	Total P applied (kg P/ha)	P animal manure (kg P/ha)	P artificial fertilizer (kg P/ha)	Total P uptake (kg P/ha)		Country	N surplus (kg N/ton)	Potato Yield (kg/ha)
	FR	17.099	38.8971	4.36953	34.5276	21.798		FR	0.386332	44260
	GE	15.8093	37.2577	8.88544	28.3723	21.4484		GE	0.363015	43550
	NL	43.6032	67.4303	52.1551	15.2752	23.8272		NL	0.901265	48380
	PL	4.97359	15.9613	4.61403	11.3472	10.9877		PL	0.222931	22310
	RO	4.3773	11.6367	2.90842	8.72833	7.25945		RO	0.296967	14740
	NL specific	11.7742	35.6014	24.3057	11.2957	23.8272		NL specific	0.24337	48380
	N-surplus							N-surplus
	Country	N surplus (kg N/ha)	Total N applied (kg N/ha)	N animal manure (kg N/ha)	N artificial fertilizer (kg N/ha)	Total N uptake (kg N/ha)		Country	N surplus (kg N/ton)	Potato Yield (kg/ha)
	FR	32.9222	175.22	17.2411	157.979	142.298		FR	0.743836	44260
	GE	23.0681	163.083	33.0819	130.001	140.015		GE	0.529693	43550
	NL	178.603	334.147	186.15	147.996	155.544		NL	3.69167	48380
	PL	-2.04927	69.6783	17.6767	52.0016	71.7275		PL	-0.0918544	22310
	RO	8.933	56.3227	11.3253	44.9974	47.3897		RO	0.606038	14740
	NL specific	125.222	280.766	104.292	176.474	155.544		NL specific	2.58831	48380
	Ammonia emission
	Country	g NH3/kg potato
	FR	0.603072
	GE	0.615304
	NL	1.41552
	PL	0.580651
	RO	0.799267
	NL specific	0.363461

## Sheet: Wheat
	N balance							P balance
	Country	N-surplus	Total N-input	N-input manure	N-input syntheic fertilizer	Total N removal (incl straw)		Country	P-surplus	Total P-input	P-input manure	P-input syntheic fertilizer	Total P removal (incl straw)
				(kg N/ha)							(kg P/ha)
	FR	30	178	17	161	148		FR	-12	13	4	9	25
	GE	18	183	33	150	165		GE	-10	18	9	9	28
	NL	199	385	186	199	186		NL	24	56	52	3	32
	PL	15	109	18	91	93		PL	4	20	5	16	16
	RO	-18	51	11	40	69		RO	-5	6	3	3	12
	NL specific	49	236	104	131	186		NL specifiek	-8	24	24	0	32
	Yield & production value		Assumed AFP ratio between straw-grain prices
	Country	Total production value (€/ha)	Grain Yield (kg/ha)	Wheat grain price (€/kg)	Straw Yield (kg/ha)	Straw price (€/kg)	Straw price (€/kg grain)	Total value (€/kg grain)
	FR	1938.74	6877	0.216852	4126	0.108445	0.0650638	0.281916
	GE	2111.27	7657	0.212094	4594	0.106065	0.0636364	0.27573
	NL	2396.79	8638	0.213428	5183	0.106733	0.064042	0.27747
	PL	1182.62	4326	0.210272	2596	0.105154	0.0631024	0.273375
	RO	879.841	3220	0.210178	1932	0.105107	0.0630644	0.273243
	NL specific	2396.79	8638	0.213428	5183	0.106733	0.064042	0.27747
	Land use
	Country	Total	Grassland national	Arable national
	FR	1.1412	0	1.1412
	GE	1.02755	0	1.02755
	NL	0.95726	0	0.95726
	PL	1.88804	0	1.88804
	RO	2.59289	0	2.59289
	Greenhouse gas emissions LCA									Greenhouse gas emissions LCA						Breakdown N2O on farm
	(kg CO2-eq/kg product)									(kg CO2-eq/kg product)							Fertilizer direct	indirect	Manure direct	indirect	Crop residues direct	indirect	Total
	Country	per kg grain excl. LUC	LUC per kg grain	per kg straw excl. LUC	LUC per kg straw.	Total excl LUC	Total incl. LUC	Contrib LUC		N2O	CO2-fossil fuel	LUC	Other			Country			CO2-eq/ha
	FR	0.387165	0.0264518	0.193616	0.0132282	0.413617	0.453297	0.0875365		0.235682	0.135129	0.0264518	0.0560337			FR	0.3143	0.8222	0.271	0.1152	1.397	2.53	5.4497
	GE	0.356018	0.0191467	0.17804	0.00957499	0.375165	0.403886	0.0711132		0.215898	0.132712	0.0191467	0.0361299			GE	2.357	0.7661	0.5198	0.2209	1.548	0.3483	5.7601
	NL	0.529355	0.0207923	0.264723	0.010398	0.550147	0.581337	0.0536527		0.374042	0.14473	0.0207923	0.0417725			NL	3.127	1.016	2.925	1.243	1.737	0.3909	10.4389
	PL	0.445139	0	0.222608	0	0.445139	0.445139	0		0.235965	0.142509	0	0.0666655			PL	1.43	0.4648	0.2778	0.1181	0.9035	0.2033	3.3975
	RO	0.451425	0.00674872	0.225752	0.00337494	0.458173	0.468297	0.021618		0.176739	0.173984	0.00674871	0.110825			RO	0.6286	0.2043	0.178	0.0756	0.6896	0.1552	1.9313
	NL specific	0.399977	0.0207923	0.200023	0.010398	0.420769	0.451959	0.0690113		0.264572	0.14063	0.0207923	0.0259649
	P-surplus									P-surplus
	Country	P surplus (kg P/ha)	Total P applied (kg P/ha)	P animal manure (kg P/ha)	P artificial fertilizer (kg P/ha)	Total P uptake (kg P/ha)	P uptake grain	P uptake straw		Country	kg/ton	Grain Yield (kg/ha)
	FR	-11.9799	13.4326	4.36953	9.06308	25.4125	21.3187	4.09382		FR	-1.74202	6877
	GE	-10.2437	18.0512	8.88544	9.16575	28.2949	23.7367	4.55817		GE	-1.33782	7657
	NL	23.726	55.6464	52.1551	3.49127	31.9204	26.7778	5.14257		NL	2.7467	8638
	PL	4.33935	20.3257	4.61403	15.7117	15.9864	13.4106	2.57575		PL	1.00309	4326
	RO	-5.49899	6.39994	2.90842	3.49152	11.8989	9.982	1.91693		RO	-1.70776	3220
	NL specific	-7.6147	24.3057	24.3057	0	31.9204	26.7778	5.14257		NL specific	-0.881535	8638
	N-surplus									N-surplus
	Country	N surplus (kg N/ha)	Total N applied (kg N/ha)	N animal manure (kg N/ha)	N artificial fertilizer (kg N/ha)	Total N uptake (kg N/ha)	N uptake grain	N uptake straw		Country	kg/ton	Grain Yield (kg/ha)
	FR	29.9069	178.243	17.2411	161.002	148.336	122.136	26.2004		FR	4.34882	6877
	GE	17.9198	183.08	33.0819	149.999	165.161	135.988	29.1723		GE	2.34032	7657
	NL	198.823	385.146	186.15	198.996	186.323	153.411	32.9125		NL	23.0172	8638
	PL	15.3623	108.677	17.6767	91.0001	93.3146	76.8298	16.4848		PL	3.55115	4326
	RO	-18.1315	51.324	11.3253	39.9988	69.4556	57.1872	12.2684		RO	-5.63091	3220
	NL specific	49.459	235.782	104.292	131.49	186.323	153.411	32.9125		NL specific	5.72574	8638
	Ammonia emission
	Country	g NH3/kg grain
	FR	2.91878
	GE	2.86043
	NL	6.95302
	PL	3.08509
	RO	2.08505
	NL specific	2.20764

## Sheet: Fresh tomato
	N balance							P balance
	Country	N-surplus	Total N-input	N removal in tomato	N removal in residues	Total N removal		Country	P-surplus	Total P-input	P removal in tomato	P removal in residues	Total P removal
				(kg N/ha)							(kg P/ha)
	ES	531	798	94	174	268		ES	170	221	19	31	50
	FR	952	1241	211	182	393		FR	26	102	43	33	76
	IT	74	181	39	67	106		IT	40	60	8	12	20
	NL	777	1688	563	347	910		NL	-1	177	116	63	179
	Yield & production value
	Country	Totale productiewaarde (€/ha)	Tomato Yield (kg/ha)	Productiewaarde tomaten (€/kg)
	ES	79705	83900	0.95
	FR	224672	188800	1.19
	IT	65988	35100	1.88
	NL	477660	502800	0.95
	Land use
	Country	Total	Arable	Horti-culture
	ES	0.11919	0	0.11919
	FR	0.0529661	0.0206568	0.0323093
	IT	0.2849	0.173789	0.111111
	NL	0.0198886	0	0.0198886
	Greenhouse gas emissions
	Land	excl. LUC	LUC	Total incl. LUC	Other CO2	CO2-fossil fuel	N2O
				CO2-eq/kg tomato
	ES	0.618196	9.04947e-05	0.618286	0.3154	0.167027	0.0800139
	FR	1.01773	9.05856e-06	1.01773	0.795117	0.0724345	0.0639809
	IT	0.440613	8.43612e-05	0.440697	0.204984	0.153336	0.0438254
	NL	0.666195	0.00029077	0.666486	0.618899	0.0495436	0.0301104
	Country	System	%	N surplus	P surplus	N-uptake	P-uptake	N in waste	P in waste			N surplus	P surplus	N surplus	P surplus
						kg/ha						kg/ha		kg/ton
	ES	Total	1	530.564	169.959	93.9725	19.2979	173.864	31.3498		ES	N surplus	P surplus	#VALUE!	#VALUE!
	FR	Greenhouse	0.43	951.707	29.3141	0	0	149.523	26.9608		FR	846.719	25.6085	4.48474	0.135638
	FR	Tunnel	0.19	47.9659	17.6005	0	0	33.0341	5.95646		IT	0	0	0	0
	FR	Open field	0.39	58.5	22.1174	0	0	0	0		NL	530.564	169.959	1.05522	0.338025
	FR	Total	1	846.719	25.6085	211.454	43.4235	182.557	32.9173
	IT	Tunnel	0.39	21.8932	13.2936	0	0	67.8068	12.2264
	IT	Open field	0.61	91.5	34.5938	0	0	0	0
	IT	total	1	74.0823	39.8147	39.3109	8.07277	67.8068	12.2264
	NL	Total	1	777.091	-1.23958	563.182	115.653	347.727	62.6996
	Ammonia emission
	Country	g NH3/kg tomato
	ES	6.95302
	FR	2.91878
	IT	2.86043
	NL	3.08509

## Sheet: Pig
	Standard EU Feed rations for industrial pig production (Liedke & Deimling, 2014)						Feed Conversion Ratio 2015 - Source Hoste: (2017)
	Ingrediënt	Share						Feed Conversion Ratio
	Wheat	0.379					Country	kg feed/kg LW
	Barley	0.311					CZ	2.99
	Corn	0.128					DE	2.87
	Soybean meal	0.068					ES	2.73
	Rapeseed meal	0.051					FR	2.83
	Wheat bran	0.022					NL	2.68
	Calcium carbonate	0.018
	amino acids	0.006
	Vitamin premix	0.005
	Salt	0.004
	Rapeseed oil	0.003
	Mono-calcium phosphate	0.002
	Dried whey	0.002
	Extruded soybean grain	0.0001
	Country	Production value (€/100 kg LW)
	CZ	1.19076
	GE	1.22228
	ES	1.26074
	FR	1.32224
	NL	1.1154
	Land use	CZ	GE	ES	FR	NL	NL specific
	Impact category			m2/kg LW
	Total	5.22227	3.58597	6.0666	3.57312	3.51485	3.4731
	Grassland national	0	0	0	0	0	0
	Arable national	4.00597	2.53282	4.45504	2.90421	0.270278	0.267118
	Grassland abroad	0	0	0	0	0	0
	Arable abroad	1.2163	1.05314	1.61157	0.668906	3.24457	3.20598
	Share land use abroad	0.232906	0.293684	0.265646	0.187205	0.923104	0.923089
	Greenhouse gas emissions	CZ	GE	ES	FR	NL	NL specific
	Impact category			kg CO2-eq/kg LW
	Total	3.55535	3.13124	3.71701	2.89718	3.16861	3.68678
	LUC	0.551867	0.514658	0.485594	0.520044	0.558054	0.551274
	Total excl. LUC	3.00348	2.61658	3.23141	2.37714	2.61056	3.13551
	Contribution LUC total	0.155222	0.164363	0.130641	0.1795	0.176119	0.149527
	Abs Contribution LUC imported feed	0.551867	0.481638	0.483433	0.463788	0.552551	0.545838
	Greenhouse gas emissions kg CO2-eq/kg LW	Total	Manure manage- ment	Domestic feed	Imported feed	Transport	Energy use	Waste	Enteric methane	LUC imported feed	Imported feed excl. LUC
	NL	3.16861	0.708579	0.365692	1.68804	0.124281	0.137499	-0.0139387	0.158465	0.545838	1.1422
	NL specific	3.68678	1.24987	0.361417	1.6683	0.122828	0.141397	-0.0137763	0.156745	0.545838	1.12246
	DE	3.13124	0.969027	0.9683	0.890081	0.0366672	0.132444	-0.0140248	0.148744	0.481638	0.408443
	FR	2.89718	0.817074	0.858413	1.00571	0.0248117	0.0563144	-0.0141534	0.149013	0.463788	0.541919
	ES	3.71701	0.906342	1.38165	1.00153	0.123569	0.137001	-0.0143234	0.181244	0.483433	0.518096
	CZ	3.55535	0.899586	1.14525	1.103	0.0355133	0.221429	-0.0158511	0.166417	0.551867	0.551131
	Gross N excretion	CZ	DE	ES	FR	NL	NL specific
				kg N/kg LW
	Breeding	11.8922	9.69524	9.95721	9.78395	7.17501	8.38785
	Fattening	34.7066	26.657	23.292	25.5919	23.8759	30.4291
	Total	46.5988	36.3522	33.2492	35.3758	31.0509	38.8169
	Gross P excretion	CZ	DE	ES	FR	NL	NL specific
				kg P/kg LW
	Breeding	1.88624	1.53486	1.64139	1.54144	1.10887	1.74216
	Fattening	5.58823	4.09593	3.42967	3.91665	3.56741	4.94974
	Total	7.47446	5.63079	5.07106	5.45809	4.67627	6.69189
	Ammonia emission
	Country	g NH3/ kg LW
	CZ	37.0702
	DE	27.1288
	ES	29.1166
	FR	28.0635
	NL	24.4461
	NL specific	13.6588

## Sheet: Broiler
	Standard EU Feed rations for industrial broiler production (Liedke & Deimling, 2014)						Feed Conversion Ratio 2015 - Source: van Horne: (2017)
	Ingrediënt	Share						Feed Conversion Ratio
	wheat	0.454					Country	kg feed/kg LW
	maize	0.242					PL	1.65
	soybean meal	0.223					GE	1.61
	calcium carbonate	0.022					ES	1.75
	rapeseed oil	0.02					FR	1.7
	rapeseed meal	0.018					NL	1.61	Value based on representative farm data "Binternet"
	mono-calcium phosphate + sodium bicarbonate	0.007					NL	1.68	Value based on national model analysis "WUM"
	amino acids	0.005							(for details Kuling et al., 2018)
	vitamin premix	0.005
	salt	0.004
	Country	Production value (€/100 kg LW)
	GE	0.914
	ES	1.14942
	FR	1.82584
	NL	0.88432
	PL	0.86596
	Land use	GE	ES	FR	PL	NL 1.68	NL 1.61	NL 1.68 specific	NL 1.61 specific	NL mean	NL mean specific
	Impact category				m2/kg LW
	Total	2.45496	3.52107	2.6269	3.312	2.8356	2.70895	2.8356	2.70895	2.77228	2.77228
	Grassland national	0	0	0	0	0	0	0	0
	Arable national	1.07983	1.60712	1.51732	2.12119	0.197482	0.188662	0.197482	0.188662
	Grassland abroad	0	0	0	0	0	0	0	0
	Arable abroad	1.37513	1.91395	1.10958	1.19081	2.63812	2.52029	2.63812	2.52029
	Share land use abroad	0.560143	0.543571	0.422391	0.359545	0.930356	0.930356	0.930356	0.930356
	Greenhouse gas emissions LUC	GE	ES	FR	PL	NL 1.68	NL 1.61	NL 1.68 specific	NL 1.61 specific	NL mean	NL mean specific
	Impact category				kg CO2-eq/kg LW
	Total	2.00767	2.32883	1.99051	2.33094	2.30979	2.20665	2.29406	2.19637	2.25822	2.24521
	LUC	0.863863	0.933358	0.917307	0.852749	0.997671	0.953113	0.997671	0.953113	0.975392	0.975392
	Total excl. LUC	1.14381	1.39548	1.0732	1.47819	1.31212	1.25354	1.29639	1.24325	1.28283	1.26982
	Contribution LUC total	0.430282	0.400783	0.46084	0.365839	0.431931	0.431927	0.434893	0.43395	0.431929	0.434421
	Abs Contribution LUC imported feed	0.838149	0.930855	0.8708	0.847001	0.993713	0.949332	0.993713	0.949332	0.971522	0.971522
	Greenhouse gas emissions kg CO2-eq/kg LW	Totaal	Manure manage-ment	Domestic feed	Imported feed	Transport	Energy use	Waste	LUC imported feed	Imported feed excl. LUC
	NL mean	2.25822	0.0838509	0.33256	1.68675	0.0804392	0.0848176	-0.0101993	0.971522	0.71523
	NL mean specific	2.24521	0.0708441	0.33256	1.68675	0.0804392	0.0848176	-0.0101993	0.971522	0.71523
	GE	2.00767	0.0802431	0.492123	1.21735	0.0464746	0.181677	-0.0101993	0.838149	0.3792
	FR	1.99051	0.0899466	0.622666	1.17414	0.039946	0.0738	-0.00998619	0.8708	0.303338
	ES	2.32883	0.0935446	0.523886	1.44086	0.113894	0.166731	-0.0100829	0.930855	0.510006
	PL	2.33094	0.0841889	0.70929	1.18489	0.0420848	0.320686	-0.0101993	0.847001	0.33789
	NL 1.68	2.30979	0.0874587	0.340156	1.72528	0.0822766	0.0848176	-0.0101993	0.993713	0.731567
	NL 1.61	2.20665	0.0802431	0.324964	1.64823	0.0786019	0.0848176	-0.0101993	0.949332	0.698894
	NL 1.68 specific	2.29406	0.0717315	0.340156	1.72528	0.0822766	0.0848176	-0.0101993	0.993713	0.731567
	NL 1.61 specific	2.19637	0.0699566	0.324964	1.64823	0.0786019	0.0848176	-0.0101993	0.949332	0.698894
	Gross N excretion	GE	ES	FR	PL	NL 1.68	NL 1.61	NL 1.68 specific	NL 1.61 specific	NL mean	NL mean specific
						kg N/kg LW
	Breeding	3.85632	3.40984	4.66526	3.85632	3.85632	3.85632	3.10279	3.10279	3.85632	3.10279
	Fattening	15.1771	19.0722	18.0347	16.271	17.2281	15.1771	19.7918	17.6253
	Total	19.0334	22.482	22.7	20.1273	21.0844	19.0334	22.8946	20.7281	20.0589	21.8114
	Gross P excretion	GE	ES	FR	PL	NL 1.68	NL 1.61	NL 1.68 specific	NL 1.61 specific	NL mean	NL mean specific
						kg P/kg LW
	Breeding	0.518898	0.458821	0.627747	0.518898	0.518898	0.518898	0.696142	0.696142	0.518898	0.696142
	Fattening	1.42088	1.94717	1.81179	1.56805	1.69683	1.42088	2.84302	2.51545
	Total	1.93978	2.40599	2.43953	2.08695	2.21572	1.93978	3.53916	3.21159	2.07775	3.37538
	Ammonia emission
	Country	g NH3/ kg LW	NL mean
	GE	13.5909
	ES	16.8046
	FR	15.6268
	PL	14.8653
	NL Conservative estimate	15.7633	15.0268
	NL Optimistic estimate	14.2903
	NL Conservative estimate specific	6.81571	6.61227
	NL Optimistic estimate specific	6.40883

## Sheet: Dairy
	Feed ration dairy cows (in kg DM/cow/yr, including feed intak young stock; source CAPRI-model
	Feed type	NL	GE	FR	IT	PO
	Field grass	3690	3162	1962	2502	2417
	Grass silage	866	1051	2749	2048	353
	Maize silage	2131	4582	1608	1353	893
	Other forages	66	410	561	416	922
	Feed concentrates	2042	907	2283	1546	3561
	Total	8796	10113	9163	7866	8146
		Production value (€/kg FPCM)
	Country	Milk	Veal	Beef
	GE	0.31814	0.0063191	0.0314031
	FR	0.32554	0.00990918	0.0525885
	IT	0.401548	0.00767779	0.032606
	NL	0.3361	0.00920654	0.0216755
	PL	0.272495	0.00758213	0.0344264
	Land use	DE	FR	IT	NL	PL
	Impact category			m2/kg FPCM
	Total	1.03615	1.14647	1.15375	1.09027	2.0672
	Grassland national	0.334044	0.406229	0.434171	0.349986	0.300293
	Arable national	0.476762	0.502994	0.259286	0.232385	1.32704
	Grassland abroad	0.00053447	4.47909e-05	0	0	0
	Arable abroad	0.22481	0.237202	0.460293	0.5079	0.439861
	Share land use abroad	0.217482	0.206937	0.398954	0.465847	0.212782
	Greenhouse gas emissions	GE	FR	IT	NL	PL	NL specific
	Impact category			kg CO2-eq/kg FPCM
	Total	1.76286	1.49359	1.62348	1.69731	2.06367	1.63417
	LUC	0.196599	0.186035	0.339386	0.303004	0.293849	0.303004
	Total excl. LUC	1.56626	1.30755	1.28409	1.39431	1.76982	1.33117
	Contribution LUC total	0.111523	0.124556	0.209049	0.17852	0.142391	0.185418
	Abs Contribution LUC imported feed	0.171201	0.164198	0.33186	0.292004	0.285726	0.292004
	Greenhouse gas emissions kg CO2-eq/kg FPCM	Total	Manure manage-ment	Domestic feed	Imported feed	Transport	Energy use	Waste	Enteric methane	LUC imported feed	Imported feed excl. LUC
	NL	1.69815	0.146374	0.461724	0.429771	0.0157916	0.0384513	-0.00133238	0.607369	0.285726	0.144045
	NL specific	1.63417	0.129376	0.461724	0.429771	0.0157916	0.0384513	-0.00133238	0.560389	0.292004	0.137768
	DE	1.76368	0.148937	0.63329	0.223284	0.00984947	0.0347555	-0.00228028	0.715844	0.171201	0.0520824
	FR	1.49476	0.159711	0.386434	0.217805	0.0130004	0.00725036	-0.00233316	0.712897	0.164198	0.0536064
	IT	1.62446	0.257556	0.244022	0.440083	0.0202707	0.0320017	-0.00242544	0.632948	0.33186	0.108223
	PL	2.06959	0.127637	0.56846	0.46329	0.0245634	0.0517883	-0.00252995	0.836377	0.285726	0.177564
	Gross N excretion kg N/kg FPCM
	Country	excretion	N-use efficiency
	DE	25.5745	0.18872
	FR	26.3242	0.18309
	IT	30.2615	0.168543
	NL	26.0959	0.185215
	PL	34.3343	0.146922
	NL specific	16.4676	0.264827
	Gross N excretion kg P/kg FPCM
	Country	excretion	P-use efficiency
	DE	2.90281	0.289039
	FR	3.33197	0.25832
	IT	3.22464	0.277148
	NL	3.0182	0.270563
	PL	4.3741	0.220572
	NL specific	2.36851	0.320959
	Ammonia emission
	Country	g NH3/ kg FCPM
	DE	14.6231
	FR	14.9433
	IT	17.389
	NL	14.1028
	PL	16.6298
	NL specific	7.71163
